# Supplementary material for: Methionine Partially Replaced by Methionyl-Methionine Dipeptide Improves Reproductive Performance over Methionine Alone in Methionine-Deficient Mice
Source: PubMed Central journal article supplement (PMC6165284; doi:10.3390/nu10091190), 2018-09-01
Supplement: nutrients-10-01190-s001.pdf [file nutrients-10-01190-s001.pdf]

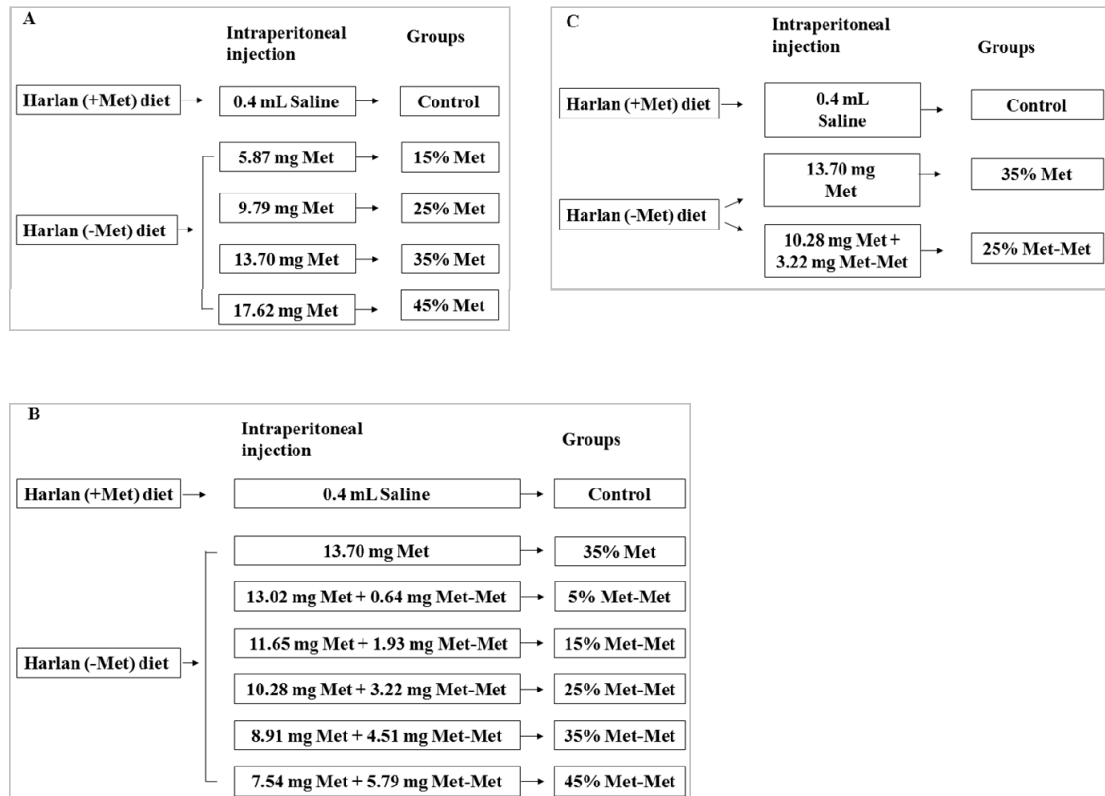

**Supplemental Figure 1.** Schematic diagram of the animal study design of Experiment I (A), Experiment II (B), and Experiment III (C). In total, 144 pregnant mice were included in this study, with 8 mice per group in experiment I and II, 16 mice in experiment III. In experiment I, the control group (Control) was fed a methionine (Met) added diet based on Harlan [Harlan (+Met) diet], with daily intraperitoneal (i.p.) injection of 0.4 mL of saline, whereas the other four groups (15%, 25%, 35%, and 45% Met groups) were fed with the same diet, but without Met [Harlan (-Met) diet], with daily i.p. injection of 15, 25, 35 or 45% Met in the control diet (39.20 mg based on 4.8 g/d dry matter intake) in 0.4 mL of saline; In experiment II, groups 1 (Control) and 2 (35% Met) were treated as described for the control group and 35% Met group in experiment I, respectively. The other 5 groups (5, 15, 25, 35, and 45% Met-Met groups) were treated as described for the 35% Met group, except that 5, 15, 25, 35, or 45% free Met in the injected solution were replaced with Methionyl-methionine (Met-Met); In experiment III, mice were randomly divided into three groups and received treatments as described for the control, 35% Met, and 25% Met-Met groups in experiment II. At E 17, half of dams in the 35% Met and 25% Met-Met groups were switched to the control diet without i.p. injection and gave birth. Of all 144 mice included in the experiments, 18 mice were aborted and removed from the experiments.

Supplemental Table 1. Ingredients of the experimental diets.

| <b>Composition (g/kg)</b>                 | <b>Control</b> | <b>Treatment</b> |
|-------------------------------------------|----------------|------------------|
| L-alanine                                 | 3.5            | 3.5              |
| L-arginine HCl                            | 12.1           | 12.1             |
| L-asparagine                              | 6              | 6                |
| L-aspartic acid                           | 3.5            | 3.5              |
| L-cystine                                 | 3.5            | 3.5              |
| L-glutamic acid                           | 35             | 35               |
| Glycine                                   | 23.3           | 23.3             |
| L-histidine HCl, monohydrate              | 4.5            | 4.5              |
| L-isoleucine                              | 8.2            | 8.2              |
| L-leucine                                 | 11.1           | 11.1             |
| L-lysine HCl                              | 18             | 18               |
| L-methionine                              | 8.2            | -                |
| L-phenylalanine                           | 11.6           | 11.6             |
| L-proline                                 | 3.5            | 3.5              |
| L-serine                                  | 3.5            | 3.5              |
| L-threonine                               | 8.2            | 8.2              |
| L-tryptophan                              | 1.8            | 1.8              |
| L-tyrosine                                | 3.5            | 3.5              |
| L-valine                                  | 8.2            | 8.2              |
| Sucrose                                   | 357.03         | 357.03           |
| Corn starch                               | 150            | 150              |
| Maltodextrin                              | 150            | 150              |
| Soybean oil                               | 80             | 80               |
| Cellulose                                 | 30             | 30               |
| Mineral Mix, AIN-93M-MX                   | 35             | 35               |
| Calcium phosphate, monobasic, monohydrate | 8.2            | 8.2              |
| Vitamin Mix, AIN-93-VX 2                  | 10             | 10               |
| Choline bitartrate                        | 2.5            | 2.5              |
| Vitamin K, menadione sodium bisulfite     | 0.05           | 0.05             |
| Red food color                            | -              | 0.1              |
| tert-Butylhydroquinone (TBHQ) antioxidant | 0.02           | 0.02             |

Diet formulation is based on TD.99366 (a standard amino acid defined diet; Harlan). Vitamin, mineral and choline contents are based on recommendations for AIN-93G (Reeves PG. J Nutr 1997; 127:838S-41S); amino acid content is based on Rogers QR and Harper AE. (J. Nutr. 1965; 87:267-73).

**Supplemental Table 2.** Primers used in mRNA abundance analysis (A), and antibodies for western blot analysis (B).

**A**

| Gene                    | Primers((5'-3')         | bp  | Gene No.       |
|-------------------------|-------------------------|-----|----------------|
| Amino acid transporters |                         |     |                |
| <i>SLC38A1-F</i>        | AGCAACGACTCTAATGACTTCAC | 81  | NM_001166458.1 |
| <i>SLC38A1-R</i>        | CCTCCTACTCTCCCGATCTGA   |     |                |
| <i>SLC38A2-F</i>        | GCTTGGCTTTATGGAGTCAAAGA | 131 | NM_175121.4    |
| <i>SLC38A2-R</i>        | TACCTGGATGCTACACAGAGG   |     |                |
| <i>SLC38A4-F</i>        | GCGGGGACAGTATTCAGGAC    | 102 | NM_027052.3    |
| <i>SLC38A4-R</i>        | GGAACCTTCTGACTTTCGGCAT  |     |                |
| <i>SLC1A1-F</i>         | CTTCCTACGGAATCACTGGCT   | 176 | NM_009199.2    |
| <i>SLC1A1-R</i>         | CGATCAGCGGCAAAATGACC    |     |                |
| <i>SLC7A1-F</i>         | CTTGGGCGTGGTGTCTATG     | 173 | NM_001301424.1 |
| <i>SLC7A1-R</i>         | CGTAGCTGTAGAGGTAGGCTG   |     |                |
| <i>SLC1A4-F</i>         | GTGGCATCGCTGTTGCTTAC    | 237 | NM_018861.3    |
| <i>SLC1A4-R</i>         | TTGCAGACGTAGTGAATGCGG   |     |                |
| <i>SLC1A5-F</i>         | CATCAACGACTCTGTTGTAGACC | 184 | NM_009201.2    |
| <i>SLC1A5-R</i>         | CGCTGGATACAGGATTGCGG    |     |                |
| <i>SLC7A9-F</i>         | GAGGAGACGGAGAGAGGATGA   | 172 | NM_001199015.1 |
| <i>SLC7A9-R</i>         | CCCCACGGATTCTGTGTTG     |     |                |
| <i>SLC7A5-F</i>         | ATATCACGCTGCTCAACGGTG   | 221 | NM_011404.3    |
| <i>SLC7A5-R</i>         | CTCCAGCATGTAGGCGTAGTC   |     |                |
| <i>SLC7A8-F</i>         | TTGCCCTGTCCACGTTTGG     | 158 | NM_016972.2    |
| <i>SLC7A8-R</i>         | GGAGAGGCATGTGAAGAGCAG   |     |                |
| <i>SLC43A2-F</i>        | TGCACCGCTGTGTTGGAAA     | 133 | NM_001199284.1 |
| <i>SLC43A2-R</i>        | CCGTGCTGTTAGTGACATTCTC  |     |                |
| <i>SLC7A7-F</i>         | AGCACCAAGTATGAAGTGGCT   | 124 | NM_001253680.1 |
| <i>SLC7A7-R</i>         | ACACGCCATTAAGCAGGGAG    |     |                |
| <i>SLC7A6-F</i>         | GCCTGCGTATGTCTGCTGA     | 117 | NM_001357381.1 |
| <i>SLC7A6-R</i>         | GCCCATGATAATGATGGCAATGA |     |                |
| <i>SLC16A10-F</i>       | AGGTGCTCTTCATGTGCATTG   | 100 | NM_028247.4    |
| <i>SLC16A10-R</i>       | TGGAGGTAGACCTTCTTCACAC  |     |                |
| Glucose transporters    |                         |     |                |
| <i>SLC2A1-F</i>         | CAGTTCGGCTATAACACTGGTG  | 156 | NM_011400.3    |
| <i>SLC2A1-R</i>         | GCCCCGACAGAGAAGATG      |     |                |
| <i>SLC2A3-F</i>         | ATGGGGACAACGAAGGTGAC    | 103 | NM_011401.4    |
| <i>SLC2A3-R</i>         | GTCTCAGGTGCATTGATGACTC  |     |                |
| <i>SLC2A4-F</i>         | GTGACTGGAACACTGGTCCTA   | 127 | NM_001359114.1 |
| <i>SLC2A4-R</i>         | CCAGCCACGTTGCATTGTAG    |     |                |
| <i>SLC2A5-F</i>         | CCAATATGGGTACAACGTAGCTG | 116 | NM_019741.3    |
| <i>SLC2A5-R</i>         | GCGTCAAGGTGAAGGACTCAATA |     |                |
| <i>SLC2A6-F</i>         | AACCGAGGGACTCGACTATGA   | 157 | NM_001177627.1 |
| <i>SLC2A6-R</i>         | CAAGGCATACCCAAAGCTGAA   |     |                |
| <i>SLC2A8-F</i>         | CCCTTCGTGACTGGCTTTG     | 138 | NM_019488.5    |
| <i>SLC2A8-R</i>         | TGGGTAGGCGATTTCCGAGAT   |     |                |
| <i>SLC2A9-F</i>         | GTACCCCTATCTGATGGAGGC   | 127 | NM_001102415.1 |
| <i>SLC2A9-R</i>         | TGCACACACATACTCTGAAAAGC |     |                |
| <i>SLC2A10-F</i>        | GCCTGACCTTCGGATATGAGC   | 165 | NM_130451.3    |
| <i>SLC2A10-R</i>        | TGCCATAGCAGTCAATGAGGA   |     |                |
| <i>SLC2A12-F</i>        | GTACCTGTTGAAAACACAGAGGG | 136 | NM_178934.4    |
| <i>SLC2A12-R</i>        | TCAGGAACGTAAACATGCTGG   |     |                |
| <i>SLC5A11-F</i>        | ATGCGGCTGACATCTCAGTC    | 247 | NM_146198.2    |
| <i>SLC5A11-R</i>        | ACCAAGGCGTTCCATTCAAAG   |     |                |
| Reference gene          |                         |     |                |
| <i>β-actin-F</i>        | GGCTGTATTCCCCTCCATCG    | 154 | NM_007393.5    |
| <i>β-actin-R</i>        | CCAGTTGGTAACAATGCCATGT  |     |                |

B

| Protein              | Supplier                                     | Item NO. |
|----------------------|----------------------------------------------|----------|
| PHT1                 | Abnova (Taipei, Taiwan)                      | 20900    |
| PepT1                | Abcam (Cambridge, MA, USA)                   | 78020    |
| PepT2                | Abcam (Cambridge, MA, USA)                   | 83771    |
| p-mTOR (Ser 2448)    | Cell Signaling Technology (Danvers, MA, USA) | 5536     |
| mTOR                 | Cell Signaling Technology (Danvers, MA, USA) | 2983     |
| p-4E-BP1 (Thr 37/46) | Cell Signaling Technology (Danvers, MA, USA) | 2855     |
| 4E-BP1               | Cell Signaling Technology (Danvers, MA, USA) | 4923     |
| p-S6K1 (Thr 389)     | Cell Signaling Technology (Danvers, MA, USA) | 9234s    |
| S6K1                 | Cell Signaling Technology (Danvers, MA, USA) | 9202,    |
| p-AKT (Ser 473)      | Cell Signaling Technology (Danvers, MA, USA) | 4060     |
| AKT                  | Cell Signaling Technology (Danvers, MA, USA) | 4691     |
| $\beta$ -actin       | Abcam (Cambridge, MA, USA)                   | 8226     |

**Supplemental Table 3.** Body weight (BW) (A), food intake (B), and cumulative food intake (C) in mice at day (E) 0 to 17 of gestation. The control group of mice (Control) was fed a diet with free methionine (Met), whereas the 5 - 45% Met groups were fed a Met-deficient diet but supplemented with 5, 15, 25, 35, and 45% Met in the control diet by intraperitoneal injection from conception.

A

| BW (g)                  | E 0                          | E 2                       | E 5                       | E 8                            | E 11                           | E 14                           |
|-------------------------|------------------------------|---------------------------|---------------------------|--------------------------------|--------------------------------|--------------------------------|
| Control ( <i>n</i> = 7) | 29.85 ± 1.25 <sup>d</sup>    | 29.74 ± 1.14 <sup>d</sup> | 31.46 ± 1.02 <sup>d</sup> | 34.28 ± 1.12 <sup>c</sup>      | 37.43 ± 1.29 <sup>b</sup>      | 44.56 ± 0.96 <sup>a</sup>      |
| 15% Met ( <i>n</i> = 6) | 30.29 ± 1.17                 | 30.95 ± 0.72              | 30.25 ± 0.89              | 29.31 ± 0.68 <sup>***</sup>    | 29.27 ± 0.75 <sup>***</sup>    | 31.43 ± 0.64 <sup>***</sup>    |
| 25% Met ( <i>n</i> = 7) | 30.98 ± 0.97                 | 30.43 ± 0.68              | 29.38 ± 1.09              | 28.94 ± 1.06 <sup>***</sup>    | 29.24 ± 1.44 <sup>***</sup>    | 32.03 ± 1.28 <sup>***</sup>    |
| 35% Met ( <i>n</i> = 7) | 30.02 ± 0.91 <sup>b</sup>    | 29.74 ± 0.99 <sup>b</sup> | 29.52 ± 0.89 <sup>b</sup> | 29.63 ± 0.78 <sup>***, b</sup> | 31.62 ± 0.84 <sup>***, b</sup> | 35.90 ± 0.91 <sup>***, a</sup> |
| 45% Met ( <i>n</i> = 6) | 30.33 ± 1.18 <sup>a, b</sup> | 29.17 ± 1.07 <sup>b</sup> | 28.87 ± 0.86 <sup>b</sup> | 29.83 ± 1.06 <sup>***, b</sup> | 29.56 ± 0.99 <sup>***, b</sup> | 32.88 ± 1.06 <sup>***, a</sup> |

B

| Food intake (g)         | E 2                      | E 5                      | E 8                            | E 11                            | E 14                          |
|-------------------------|--------------------------|--------------------------|--------------------------------|---------------------------------|-------------------------------|
| Control ( <i>n</i> = 7) | 3.87 ± 0.22 <sup>c</sup> | 3.51 ± 0.17 <sup>c</sup> | 3.57 ± 0.17 <sup>c</sup>       | 5.48 ± 0.20 <sup>b</sup>        | 6.15 ± 0.21 <sup>a</sup>      |
| 15% Met ( <i>n</i> = 6) | 3.22 ± 0.32 <sup>b</sup> | 3.09 ± 0.37 <sup>b</sup> | 2.97 ± 0.26 <sup>b</sup>       | 3.75 ± 0.43 <sup>**, a, b</sup> | 4.23 ± 0.26 <sup>***, a</sup> |
| 25% Met ( <i>n</i> = 7) | 3.38 ± 0.31 <sup>b</sup> | 3.30 ± 0.23 <sup>b</sup> | 3.44 ± 0.24 <sup>b</sup>       | 4.20 ± 0.25 <sup>**, a</sup>    | 4.37 ± 0.18 <sup>***, a</sup> |
| 35% Met ( <i>n</i> = 7) | 3.15 ± 0.26 <sup>b</sup> | 3.44 ± 0.30 <sup>b</sup> | 3.23 ± 0.22 <sup>b</sup>       | 4.33 ± 0.30 <sup>**, a</sup>    | 4.90 ± 0.26 <sup>***, a</sup> |
| 45% Met ( <i>n</i> = 6) | 3.30 ± 0.28 <sup>d</sup> | 3.11 ± 0.26 <sup>d</sup> | 3.52 ± 0.18 <sup>b, c, d</sup> | 4.14 ± 0.18 <sup>**, a, b</sup> | 4.72 ± 0.19 <sup>***, a</sup> |

C

| Cumulative food intake (g) | E 5                      | E 8                         | E 11                          | E 14                          |
|----------------------------|--------------------------|-----------------------------|-------------------------------|-------------------------------|
| Control ( <i>n</i> = 7)    | 7.38 ± 0.37 <sup>d</sup> | 10.94 ± 0.37 <sup>c</sup>   | 16.4 ± 0.48 <sup>b</sup>      | 22.6 ± 0.50 <sup>a</sup>      |
| 15% Met ( <i>n</i> = 6)    | 6.31 ± 0.51 <sup>d</sup> | 9.29 ± 0.47 <sup>*, c</sup> | 13.0 ± 0.65 <sup>***, b</sup> | 17.1 ± 0.51 <sup>***, a</sup> |
| 25% Met ( <i>n</i> = 7)    | 6.68 ± 0.45 <sup>d</sup> | 10.1 ± 0.61 <sup>c</sup>    | 14.3 ± 0.73 <sup>*, b</sup>   | 18.7 ± 0.75 <sup>***, a</sup> |
| 35% Met ( <i>n</i> = 7)    | 6.60 ± 0.48 <sup>d</sup> | 9.83 ± 0.65 <sup>c</sup>    | 14.2 ± 0.71 <sup>*, b</sup>   | 19.1 ± 0.73 <sup>***, a</sup> |
| 45% Met ( <i>n</i> = 6)    | 6.41 ± 0.44 <sup>d</sup> | 9.94 ± 0.49 <sup>c</sup>    | 14.1 ± 0.41 <sup>*, b</sup>   | 18.8 ± 0.54 <sup>***, a</sup> |

Data are expressed as the mean ± SEM. \*, \*\*, \*\*\* significantly different from the control group at the same stage of gestation at  $p < .05$  or  $p < .01$  or  $p < .001$ , respectively. Values with different letters differ significantly ( $p < .05$ ) between different stages of gestation within group.

**Supplemental Table 4.** Methionine (Met) metabolites (nmol/g) in the liver of mice with different free Met supplementation at day 17 of gestation. The control group of mice (Control) were fed a diet with Met, and the 15 - 45% Met groups were fed a Met-restricted diet supplemented with 15, 25, 35, and 45% Met in the control diet by intraperitoneal injection.

|                         | Met         | SAM        | SAH        | Cysteine   | Homocysteine |
|-------------------------|-------------|------------|------------|------------|--------------|
| Control ( <i>n</i> = 7) | 64.53±1.42  | 78.67±0.86 | 46.78±1.70 | 81.66±2.27 | 5.74±0.13    |
| 15% Met ( <i>n</i> = 6) | 63.61±1.30  | 81.07±0.72 | 43.34±0.78 | 85.34±1.21 | 5.62±0.11    |
| 25% Met ( <i>n</i> = 7) | 67.67±1.38  | 77.77±1.08 | 46.82±1.30 | 80.58±1.66 | 5.69±0.10    |
| 35% Met ( <i>n</i> = 7) | 64.99±1.24  | 79.56±1.23 | 49.40±1.06 | 83.85±1.97 | 5.96±0.13    |
| 45% Met ( <i>n</i> = 6) | 68.14± 2.20 | 77.54±1.26 | 49.88±1.20 | 81.37±2.12 | 6.03±0.15    |

SAM, adenosylmethionine; SAH, adenosylhomocysteine.

**Supplemental Table 5.** Body weight (BW) (A), food intake (B), and cumulative food intake (C) during gestation period when different levels of methionine (Met) were supplemented in the form of methionyl-methionine (Met-Met). The control group of mice (Control) was fed a diet with Met, and the 35% Met group was fed a Met-deficient diet but supplemented with 35% of Met in the control diet by intraperitoneal injection. In 5, 15, 25, 35, and 45% Met-Met groups, 5, 15, 25, 35, and 45% Met in 35% Met group was replaced with Met-Met.

A

| BW (g)                      | E 0                     | E 2                     | E 5                       | E 8                       | E 11                         | E 14                        |
|-----------------------------|-------------------------|-------------------------|---------------------------|---------------------------|------------------------------|-----------------------------|
| Control ( <i>n</i> = 8)     | 30.27±1.10 <sup>d</sup> | 30.14±0.74 <sup>d</sup> | 32.24±0.82 <sup>c,d</sup> | 34.67±0.84 <sup>c</sup>   | 37.85±0.68 <sup>b</sup>      | 45.05±0.98 <sup>a</sup>     |
| 35% Met ( <i>n</i> = 6)     | 30.44±1.13 <sup>b</sup> | 30.21±1.52 <sup>b</sup> | 30.02±1.37 <sup>b</sup>   | 29.64±1.39 <sup>*,b</sup> | 31.56±0.96 <sup>***,ab</sup> | 34.31±0.99 <sup>***,a</sup> |
| 5% Met-Met ( <i>n</i> = 6)  | 28.54±0.91 <sup>b</sup> | 28.16±0.85 <sup>b</sup> | 29.12±1.13 <sup>b</sup>   | 29.56±1.34 <sup>*,b</sup> | 31.33±1.40 <sup>***,b</sup>  | 34.86±1.24 <sup>***,a</sup> |
| 15% Met-Met ( <i>n</i> = 7) | 29.75±1.05 <sup>b</sup> | 29.99±1.06 <sup>b</sup> | 30.54±1.20 <sup>b</sup>   | 31.36±1.22 <sup>*,b</sup> | 33.14±1.23 <sup>***,b</sup>  | 37.04±1.27 <sup>***,a</sup> |
| 25% Met-Met ( <i>n</i> = 7) | 29.91±0.88 <sup>c</sup> | 29.81±0.85 <sup>c</sup> | 30.89±0.99 <sup>c</sup>   | 31.36±1.22 <sup>c</sup>   | 34.41±1.04 <sup>*,b</sup>    | 38.54±1.44 <sup>***,a</sup> |
| 35% Met-Met ( <i>n</i> = 7) | 30.79±0.60 <sup>b</sup> | 30.61±0.73 <sup>b</sup> | 30.71±1.02 <sup>b</sup>   | 31.34±1.05 <sup>*,b</sup> | 32.93±1.35 <sup>***,b</sup>  | 36.00±1.29 <sup>***,a</sup> |
| 45% Met-Met ( <i>n</i> = 6) | 30.06±1.11 <sup>b</sup> | 29.78±0.83 <sup>b</sup> | 29.92±0.73 <sup>b</sup>   | 30.69±0.94 <sup>*,b</sup> | 32.08±0.89 <sup>***,ab</sup> | 34.29±0.87 <sup>***,a</sup> |

B

| Food intake (g)             | E 2                     | E 5                     | E 8                     | E 11                        | E 14                       |
|-----------------------------|-------------------------|-------------------------|-------------------------|-----------------------------|----------------------------|
| Control ( <i>n</i> = 8)     | 3.45±0.24 <sup>c</sup>  | 3.67±0.23 <sup>c</sup>  | 3.46±0.18 <sup>c</sup>  | 5.61±0.14 <sup>b</sup>      | 6.20±0.16 <sup>a</sup>     |
| 35% Met ( <i>n</i> = 6)     | 3.24±0.27 <sup>b</sup>  | 3.22±0.23 <sup>b</sup>  | 3.30±0.32 <sup>b</sup>  | 4.04±0.25 <sup>***,a</sup>  | 4.40±0.22 <sup>***,a</sup> |
| 5% Met-Met ( <i>n</i> = 6)  | 3.11±0.23 <sup>bc</sup> | 3.38±0.22 <sup>b</sup>  | 3.53±0.22 <sup>b</sup>  | 4.14±0.42 <sup>***,ab</sup> | 4.60±0.17 <sup>***,a</sup> |
| 15% Met-Met ( <i>n</i> = 7) | 3.25±0.17 <sup>b</sup>  | 3.39±0.21 <sup>b</sup>  | 3.58±0.20 <sup>b</sup>  | 4.55±0.21 <sup>***,a</sup>  | 4.46±0.21 <sup>***,a</sup> |
| 25% Met-Met ( <i>n</i> = 7) | 3.56±0.22 <sup>b</sup>  | 3.40±0.21 <sup>b</sup>  | 3.47±0.14 <sup>b</sup>  | 4.47±0.15 <sup>***,a</sup>  | 4.69±0.20 <sup>***,a</sup> |
| 35% Met-Met ( <i>n</i> = 7) | 3.49±0.17 <sup>cd</sup> | 3.37±0.25 <sup>cd</sup> | 3.71±0.20 <sup>bc</sup> | 4.05±0.16 <sup>***,b</sup>  | 4.60±0.16 <sup>***,a</sup> |
| 45% Met-Met ( <i>n</i> = 6) | 3.50±0.22 <sup>b</sup>  | 3.73±0.21 <sup>b</sup>  | 3.70±0.17 <sup>b</sup>  | 3.96±0.19 <sup>***,ab</sup> | 4.48±0.28 <sup>***,a</sup> |

C

| Cumulative food intake (g)  | E 5                    | E 8                    | E 11                       | E 14                       |
|-----------------------------|------------------------|------------------------|----------------------------|----------------------------|
| Control ( <i>n</i> = 8)     | 7.11±0.33 <sup>d</sup> | 10.6±0.37 <sup>c</sup> | 16.2±0.38 <sup>b</sup>     | 22.4±0.27 <sup>a</sup>     |
| 35% Met ( <i>n</i> = 6)     | 6.46±0.42 <sup>d</sup> | 9.75±0.22 <sup>c</sup> | 13.8±0.32 <sup>***,b</sup> | 18.2±0.36 <sup>***,a</sup> |
| 5% Met-Met ( <i>n</i> = 6)  | 6.50±0.30 <sup>d</sup> | 10.0±0.28 <sup>c</sup> | 14.2±0.44 <sup>***,b</sup> | 18.8±0.43 <sup>***,a</sup> |
| 15% Met-Met ( <i>n</i> = 7) | 6.95±0.22 <sup>d</sup> | 10.5±0.34 <sup>c</sup> | 15.1±0.45 <sup>*,b</sup>   | 19.5±0.54 <sup>***,a</sup> |
| 25% Met-Met ( <i>n</i> = 7) | 6.96±0.36 <sup>d</sup> | 10.4±0.38 <sup>c</sup> | 14.9±0.37 <sup>*,b</sup>   | 19.6±0.42 <sup>***,a</sup> |
| 35% Met-Met ( <i>n</i> = 7) | 6.86±0.35 <sup>d</sup> | 10.6±0.35 <sup>c</sup> | 14.7±0.34 <sup>*,b</sup>   | 19.2±0.27 <sup>***,a</sup> |
| 45% Met-Met ( <i>n</i> = 6) | 7.23±0.34 <sup>d</sup> | 10.9±0.36 <sup>c</sup> | 14.9±0.39 <sup>*,b</sup>   | 19.4±0.45 <sup>***,a</sup> |

Data are expressed as the mean ± SEM, *n* = 6–8. \*, \*\*, \*\*\* significantly different from the control group at the same stage of gestation at  $p < 0.05$  or  $p < 0.01$  or  $p < 0.001$ , respectively. Values with different letters differ significantly ( $p < 0.05$ ) between different stages of gestation within group.

**Supplemental Table 6.** Plasma concentrations of free amino acids (FAAs,  $\mu\text{g/ml}$ ) in maternal and fetal on day 17 of gestation in mice with different sources of methionine (Met) supplementation ( $n = 8$ ). In Control group, pregnant mice were fed a diet containing free Met. In the 35% Met group, pregnant mice were fed a Met-deficient diet with intraperitoneal injection of 35% Met contained in the control diet. The 25% methionyl-methionine (Met-Met) group was treated as 35% Met group, except that 25% of injected Met was replaced with Met-Met.

| FAAs ( $\mu\text{g/ml}$ ) | Dams                         |                              |                              | Embryos                      |                              |                              |
|---------------------------|------------------------------|------------------------------|------------------------------|------------------------------|------------------------------|------------------------------|
|                           | Control                      | 35% Met                      | 25% Met-Met                  | Control                      | 35% Met                      | 25% Met-Met                  |
| EAAAs                     | 227 $\pm$ 2.50 <sup>a</sup>  | 132 $\pm$ 7.45 <sup>c</sup>  | 184 $\pm$ 3.57 <sup>b</sup>  | 326 $\pm$ 5.70 <sup>a</sup>  | 21.3 $\pm$ 11.0 <sup>c</sup> | 297 $\pm$ 11.20 <sup>b</sup> |
| Arg                       | 6.53 $\pm$ 0.39 <sup>a</sup> | 4.85 $\pm$ 0.20 <sup>b</sup> | 5.33 $\pm$ 0.45 <sup>b</sup> | 10.6 $\pm$ 0.69 <sup>a</sup> | 5.43 $\pm$ 0.32 <sup>b</sup> | 11.5 $\pm$ 0.44 <sup>a</sup> |
| His                       | 8.79 $\pm$ 0.17 <sup>a</sup> | 5.72 $\pm$ 0.78 <sup>b</sup> | 7.75 $\pm$ 0.20 <sup>a</sup> | 15.3 $\pm$ 1.00              | 12.5 $\pm$ 0.81              | 11.8 $\pm$ 1.59              |
| Ile                       | 9.07 $\pm$ 0.28 <sup>a</sup> | 3.62 $\pm$ 0.25 <sup>c</sup> | 7.04 $\pm$ 0.54 <sup>b</sup> | 14.6 $\pm$ 0.96 <sup>a</sup> | 7.92 $\pm$ 0.72 <sup>b</sup> | 13.3 $\pm$ 1.29 <sup>a</sup> |
| Leu                       | 19.4 $\pm$ 0.68 <sup>a</sup> | 5.71 $\pm$ 0.69 <sup>c</sup> | 17.1 $\pm$ 0.64 <sup>b</sup> | 34.4 $\pm$ 1.94 <sup>a</sup> | 20.3 $\pm$ 1.24 <sup>b</sup> | 33.4 $\pm$ 2.95 <sup>b</sup> |
| Lys                       | 88.4 $\pm$ 1.45 <sup>a</sup> | 51.7 $\pm$ 3.18 <sup>b</sup> | 87.4 $\pm$ 1.85 <sup>a</sup> | 134 $\pm$ 2.86 <sup>a</sup>  | 78.9 $\pm$ 4.55 <sup>c</sup> | 117 $\pm$ 1.55 <sup>b</sup>  |
| Met                       | 26.5 $\pm$ 1.61 <sup>a</sup> | 21.5 $\pm$ 1.50 <sup>b</sup> | 6.92 $\pm$ 0.36 <sup>c</sup> | 15.1 $\pm$ 0.40 <sup>a</sup> | 4.66 $\pm$ 0.14 <sup>c</sup> | 11.8 $\pm$ 0.55 <sup>b</sup> |
| Phe                       | 6.96 $\pm$ 0.25 <sup>a</sup> | 4.62 $\pm$ 0.55 <sup>b</sup> | 4.64 $\pm$ 0.12 <sup>b</sup> | 23.5 $\pm$ 0.95              | 22.3 $\pm$ 1.57              | 10.6 $\pm$ 1.82              |
| Thr                       | 30.9 $\pm$ 0.72 <sup>a</sup> | 22.9 $\pm$ 3.56 <sup>b</sup> | 24.2 $\pm$ 1.12 <sup>b</sup> | 43.9 $\pm$ 1.87 <sup>a</sup> | 34.9 $\pm$ 2.38 <sup>b</sup> | 42.3 $\pm$ 2.49 <sup>a</sup> |
| Val                       | 30.6 $\pm$ 0.73 <sup>a</sup> | 11.6 $\pm$ 0.90 <sup>c</sup> | 24.1 $\pm$ 1.34 <sup>b</sup> | 34.5 $\pm$ 1.35 <sup>a</sup> | 24.5 $\pm$ 1.93 <sup>b</sup> | 35.7 $\pm$ 2.62 <sup>a</sup> |
| NEAAs                     | 286 $\pm$ 4.31 <sup>a</sup>  | 149 $\pm$ 10.32 <sup>c</sup> | 233 $\pm$ 5.45 <sup>b</sup>  | 409 $\pm$ 13.3 <sup>a</sup>  | 282 $\pm$ 8.57 <sup>c</sup>  | 369 $\pm$ 13.8 <sup>b</sup>  |
| Ala                       | 79.5 $\pm$ 2.78 <sup>a</sup> | 37.0 $\pm$ 4.62 <sup>c</sup> | 66.7 $\pm$ 2.92 <sup>b</sup> | 105 $\pm$ 6.69 <sup>a</sup>  | 73.1 $\pm$ 4.28 <sup>b</sup> | 103 $\pm$ 7.02 <sup>a</sup>  |
| Asp                       | 169 $\pm$ 4.41 <sup>a</sup>  | 90.7 $\pm$ 5.00 <sup>c</sup> | 138 $\pm$ 3.36 <sup>b</sup>  | 185 $\pm$ 3.46 <sup>a</sup>  | 133 $\pm$ 5.29 <sup>c</sup>  | 164 $\pm$ 8.00 <sup>b</sup>  |
| Cys                       | 11.3 $\pm$ 0.40 <sup>a</sup> | 9.95 $\pm$ 0.31 <sup>b</sup> | 9.58 $\pm$ 0.18 <sup>b</sup> | 17.1 $\pm$ 0.65 <sup>a</sup> | 10.1 $\pm$ 0.55 <sup>c</sup> | 12.9 $\pm$ 0.73 <sup>b</sup> |
| Glu                       | 5.15 $\pm$ 0.22 <sup>a</sup> | 1.69 $\pm$ 0.15 <sup>c</sup> | 2.93 $\pm$ 0.16 <sup>b</sup> | 8.30 $\pm$ 0.35 <sup>a</sup> | 4.77 $\pm$ 0.29 <sup>c</sup> | 5.98 $\pm$ 0.27 <sup>b</sup> |
| Gly                       | 2.62 $\pm$ 0.12 <sup>a</sup> | 2.26 $\pm$ 0.08 <sup>b</sup> | 1.69 $\pm$ 0.08 <sup>c</sup> | 24.0 $\pm$ 3.14              | 26.6 $\pm$ 1.58              | 25.2 $\pm$ 0.93              |
| Ser                       | 8.52 $\pm$ 0.20 <sup>a</sup> | 4.97 $\pm$ 0.46 <sup>c</sup> | 7.10 $\pm$ 0.26 <sup>b</sup> | 46.2 $\pm$ 2.33 <sup>a</sup> | 30.7 $\pm$ 2.66 <sup>b</sup> | 42.9 $\pm$ 2.18 <sup>a</sup> |
| Tyr                       | 10.3 $\pm$ 0.34 <sup>a</sup> | 2.54 $\pm$ 0.44 <sup>c</sup> | 7.20 $\pm$ 0.33 <sup>b</sup> | 23.0 $\pm$ 0.79 <sup>a</sup> | 13.2 $\pm$ 0.40 <sup>c</sup> | 15.0 $\pm$ 0.52 <sup>b</sup> |
| Total FAA                 | 513 $\pm$ 6.12 <sup>a</sup>  | 281 $\pm$ 17.1 <sup>c</sup>  | 418 $\pm$ 8.36 <sup>b</sup>  | 735 $\pm$ 17.7 <sup>a</sup>  | 493 $\pm$ 17.4 <sup>c</sup>  | 666 $\pm$ 22.8 <sup>b</sup>  |

EAAAs, essential amino acids; NEAAs, nonessential amino acids; Data are expressed as the mean  $\pm$  SEM. The different letters indicate significant differences,  $p < 0.05$ .



**Supplemental Table 7.** The mRNA abundance of nutrient transporters in placenta of mice with different sources of methionine (Met) supplementation on day 17 of gestation. In Control group, pregnant mice were fed a diet containing free Met. In the 35% Met group, pregnant mice were fed a Met deficient diet with intraperitoneal injection of 35% Met contained in the control diet. The 25% methionyl-methionine (Met-Met) group was treated as described for the 35% Met group, except that 25% of injected Met was replaced with Met-Met. Three placentas from each groups were selected randomly,  $n = 3$ . The experiment was repeated 3 times.

| Gene                 | Description                                        | Control                  | 35% Met                   | 25% Met-Met                 |
|----------------------|----------------------------------------------------|--------------------------|---------------------------|-----------------------------|
| AA transporters      |                                                    |                          |                           |                             |
| SLC38A1              | Neutral amino acid transporter                     | 1.00 ± 0.05 <sup>a</sup> | 0.68 ± 0.11 <sup>b</sup>  | 0.82 ± 0.12 <sup>a,b</sup>  |
| SLC38A2              | Neutral amino acid transporter                     | 1.00 ± 0.05 <sup>a</sup> | 0.46 ± 0.11 <sup>b</sup>  | 0.99 ± 0.13 <sup>a,b</sup>  |
| SLC38A4              | Neutral amino acid transporter                     | 1.00 ± 0.05 <sup>a</sup> | 0.561 ± 0.13 <sup>b</sup> | 0.931 ± 0.17 <sup>a,b</sup> |
| SLC1A1               | Glutamate transporter                              | 1.00 ± 0.04 <sup>a</sup> | 0.59 ± 0.10 <sup>b</sup>  | 0.53 ± 0.05 <sup>b</sup>    |
| SLC1A3               | Glutamate transporter                              | 1.00 ± 0.01 <sup>a</sup> | 0.65 ± 0.07 <sup>b</sup>  | 0.58 ± 0.06 <sup>b</sup>    |
| SLC7A1               | L-arginine transporter                             | 1.00 ± 0.03              | 1.03 ± 0.04               | 0.94 ± 0.10                 |
| SLC1A4               | Neutral amino acid transporter                     | 1.00 ± 0.01              | 0.90 ± 0.11               | 0.99 ± 0.15                 |
| SLC1A5               | Neutral amino acid transporter                     | 1.00 ± 0.01              | 1.09 ± 0.08               | 1.14 ± 0.06                 |
| SLC7A9               | Cationic amino acid transporter                    | 1.00 ± 0.03 <sup>a</sup> | 0.54 ± 0.04 <sup>b</sup>  | 0.97 ± 0.25 <sup>a,b</sup>  |
| SLC7A5               | Branched-chain and aromatic amino acid transporter | 1.00 ± 0.04              | 0.21 ± 0.16               | 1.18 ± 0.09                 |
| SLC7A8               | Branched-chain and aromatic amino acid transporter | 1.00 ± 0.04 <sup>a</sup> | 0.10 ± 0.04 <sup>c</sup>  | 0.48 ± 0.11 <sup>b</sup>    |
| SLC43A2              | Leu, Phe, Val, Met transporter                     | 1.00 ± 0.03 <sup>a</sup> | 0.54 ± 0.08 <sup>b</sup>  | 0.88 ± 0.22 <sup>a,b</sup>  |
| SLC43A1              | Leu, Phe, Val, Met transporter                     | 1.00 ± 0.01 <sup>a</sup> | 0.58 ± 0.05 <sup>b</sup>  | 0.84 ± 0.11 <sup>a</sup>    |
| SLC7A7               | Cationic amino acid transporter                    | 1.00 ± 0.02              | 0.75 ± 0.16               | 0.76 ± 0.11                 |
| SLC7A6               | Cationic amino acid transporter                    | 1.00 ± 0.03 <sup>a</sup> | 0.12 ± 0.05 <sup>c</sup>  | 0.51 ± 0.11 <sup>b</sup>    |
| SLC16A10             | Monocarboxylic acid transporter                    | 1.00 ± 0.03 <sup>a</sup> | 0.64 ± 0.09 <sup>b</sup>  | 0.79 ± 0.11 <sup>a,b</sup>  |
| SLC7A3               | Cationic amino acid transporter                    | 1.00 ± 0.01 <sup>a</sup> | 0.59 ± 0.13 <sup>b</sup>  | 0.63 ± 0.14 <sup>b</sup>    |
| SLC7A4               | Cationic amino acid transporter                    | 1.00 ± 0.02 <sup>a</sup> | 0.38 ± 0.11 <sup>b</sup>  | 0.89 ± 0.17 <sup>a</sup>    |
| Glucose transporters |                                                    |                          |                           |                             |
| SLC2A1               | Glucose, galactose, mannose transporter            | 1.00 ± 0.11 <sup>a</sup> | 0.58 ± 0.13 <sup>b</sup>  | 0.77 ± 0.11 <sup>a,b</sup>  |
| SLC2A3               | Glucose, galactose, mannose, maltose transporter   | 1.00 ± 0.02 <sup>a</sup> | 0.49 ± 0.09 <sup>b</sup>  | 0.71 ± 0.17 <sup>a,b</sup>  |
| SLC2A4               | Glucose/fructose transporter                       | 1.00 ± 0.01 <sup>a</sup> | 0.59 ± 0.12 <sup>b</sup>  | 0.73 ± 0.11 <sup>a,b</sup>  |
| SLC2A5               | Glucose transporter                                | 1.00 ± 0.01 <sup>a</sup> | 0.40 ± 0.04 <sup>c</sup>  | 0.73 ± 0.10 <sup>b</sup>    |
| SLC2A6               | Glucose transporter                                | 1.00 ± 0.01              | 0.88 ± 0.10               | 1.19 ± 0.28                 |
| SLC2A8               | Glucose and fructose transporter                   | 1.00 ± 0.02              | 0.83 ± 0.22               | 0.91 ± 0.26                 |
| SLC2A9               | Glucose and galactose transporter                  | 1.00 ± 0.05              | 0.88 ± 0.25               | 0.97 ± 0.32                 |
| SLC2A10              | Glucose transporter                                | 1.00 ± 0.02 <sup>a</sup> | 0.46 ± 0.11 <sup>b</sup>  | 0.80 ± 0.16 <sup>a</sup>    |
| SLC2A12              | Glucose transporter                                | 1.00 ± 0.04              | 0.79 ± 0.26               | 0.98 ± 0.26                 |
| SLC5A11              | Glucose, galactose, mannose transporter            | 1.00 ± 0.05              | 0.73 ± 0.19               | 0.75 ± 0.22                 |

Data are expressed as the mean ± SEM. The different letters indicate significant differences,  $p < 0.05$ .
